# Supplementary material for: Different Cutibacterium acnes Phylotypes Release Distinct Extracellular Vesicles
Source: MDPI journal article supplement (doi:10.3390/ijms23105797), 2022-05-21
Supplement: s1 [file s1]

## Supplementary material

### Different *Cutibacterium acnes* phylotypes release distinct extracellular vesicles

Anna Chudzik, Paweł Migdał, Mariola Paściak

SDS-PAGE analysis of pure culture medium in order to exclude the influence of the medium on the measurement (Fig. S1). The absence of proteins in lanes 2-4 indicates the absence of media derived proteins by SDS-PAGE analysis.

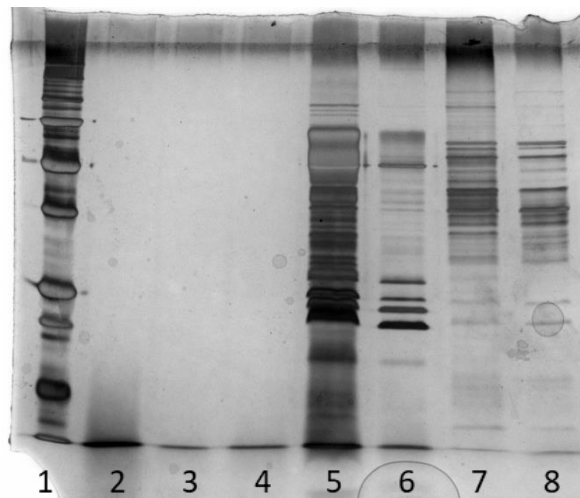

**Figure S1. SDS-PAGE of pure culture medium and EVs fractions in order to exclude the influence of the medium on the measurement.** 1. Marker. 2. Pure culture medium sterilized using filters with a 0.22  $\mu\text{m}$  membrane. 3. The sediment formed after ultracentrifugation and the procedure identical to that during the extraction of EVs was carried out. 4. Supernatant formed after ultracentrifugation and the procedure identical to that during the extraction of EVs was carried out. 5-6. EVs isolated from *C. acnes* DSM 1897 (different concentrations), 7-8. EVs isolated from *C. acnes* PCM 2334 (different concentrations).

TLC lipid profile analysis of pure culture medium in order to exclude the influence of the medium on the measurement (Fig. S2). The absence of lipid spots proves the absence of lipids in the medium obtained after ultracentrifugation and the procedure identical to that in the collection of EVs.

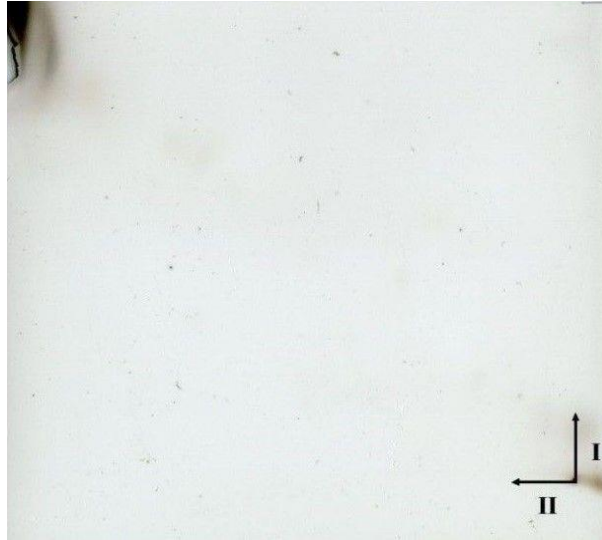

**Figure S2.** 2D-TLC lipid analysis of medium obtained after ultracentrifugation and the procedure identical to that in the collection of EVs. The TLC was developed in (I) chloroform-methanol-water (65:25:4, v/v), II chloroform-methanol-acetic acid-water (80:15:12:4, v/v) and for the detection of lipids copper sulphate reagent and heating at 130 °C were applied.

## List of MALDI-TOF MS mass peaks for EVs lipid extract of *C. acnes* strains

**Table S1.** List of MALDI-TOF MS mass peaks for EVs lipid extract of *C. acnes* DSM 1897 strain. Yellow lines have been removed from the analysis as medium contamination

| m/z      | time     | Intens.    | SN      | Quality Fac. | Res.      | Area      | Rel. Intens. | FWHM  | Chi^2        |
|----------|----------|------------|---------|--------------|-----------|-----------|--------------|-------|--------------|
| 711,389  | 42172,89 | 25563,309  | 34,636  | 36116,541    | 8015,775  | 4003,673  | 0,125        | 0,089 | 206717,160   |
| 733,367  | 42813,17 | 18993,222  | 25,610  | 15318,980    | 7095,269  | 3544,881  | 0,093        | 0,103 | 278931,075   |
| 739,419  | 42987,78 | 19890,160  | 26,771  | 17291,731    | 7822,527  | 3381,346  | 0,097        | 0,095 | 244135,607   |
| 755,390  | 43445,15 | 7731,539   | 9,954   | 2209,243     | 7118,319  | 1451,965  | 0,038        | 0,106 | 118491,887   |
| 767,450  | 43787,31 | 6946,941   | 8,782   | 651,892      | 6328,500  | 1423,414  | 0,034        | 0,121 | 338525,905   |
| 821,036  | 45275,92 | 5795,718   | 6,920   | 2039,308     | 2289,473  | 3808,923  | 0,028        | 0,359 | 172808,985   |
| 827,431  | 45450,28 | 10663,669  | 13,286  | 6118,079     | 7884,772  | 2014,940  | 0,052        | 0,105 | 91629,531    |
| 843,391  | 45882,47 | 9055,039   | 11,160  | 1161,762     | 6532,557  | 2111,055  | 0,044        | 0,129 | 484817,382   |
| 860,390  | 46338,33 | 30430,704  | 38,961  | 50135,102    | 8486,466  | 5879,593  | 0,148        | 0,101 | 322173,795   |
| 865,419  | 46472,33 | 34006,188  | 43,538  | 46918,562    | 8170,623  | 6848,301  | 0,166        | 0,106 | 578305,111   |
| 867,443  | 46526,14 | 11709,005  | 14,524  | 6688,120     | 6615,598  | 3019,078  | 0,057        | 0,131 | 140784,949   |
| 882,375  | 46921,24 | 32232,199  | 41,083  | 21524,687    | 7309,481  | 7696,830  | 0,157        | 0,121 | 1297085,461  |
| 889,454  | 47107,36 | 7477,423   | 8,903   | 6149,865     | 8585,773  | 1391,908  | 0,036        | 0,104 | 39477,889    |
| 898,335  | 47339,82 | 5697,298   | 6,582   | 1023,760     | 5085,481  | 1991,501  | 0,028        | 0,177 | 195052,823   |
| 911,424  | 47680,33 | 205162,012 | 263,557 | 82657,014    | 7745,196  | 48505,837 | 1,000        | 0,118 | 28028602,253 |
| 927,401  | 48092,68 | 30801,950  | 38,671  | 60177,262    | 8662,161  | 6593,274  | 0,150        | 0,107 | 325134,240   |
| 933,409  | 48246,81 | 145036,643 | 185,793 | 97633,825    | 7676,709  | 35976,628 | 0,707        | 0,122 | 12163930,681 |
| 949,385  | 48654,28 | 29394,690  | 36,726  | 18891,211    | 8181,867  | 6972,449  | 0,143        | 0,116 | 1080184,750  |
| 982,474  | 49487,38 | 10484,347  | 12,537  | 3876,504     | 8253,082  | 2412,480  | 0,051        | 0,119 | 152821,970   |
| 987,512  | 49612,97 | 13059,084  | 15,859  | 5597,823     | 9200,691  | 2740,584  | 0,064        | 0,107 | 232135,225   |
| 998,457  | 49884,74 | 6912,082   | 7,985   | 1569,541     | 8413,088  | 1620,641  | 0,034        | 0,119 | 163599,592   |
| 1010,497 | 50181,97 | 8088,028   | 9,518   | 331,259      | 9599,011  | 1652,112  | 0,039        | 0,105 | 1177432,862  |
| 1024,507 | 50525,62 | 13383,308  | 16,245  | 5431,398     | 8792,507  | 3071,956  | 0,065        | 0,117 | 198178,006   |
| 1033,497 | 50744,88 | 14192,704  | 17,201  | 1942,174     | 8744,182  | 3435,751  | 0,069        | 0,118 | 1084420,200  |
| 1046,492 | 51060,15 | 9055,760   | 10,657  | 888,774      | 7865,347  | 2404,554  | 0,044        | 0,133 | 550209,183   |
| 1076,518 | 51781,16 | 13080,114  | 15,809  | 4041,520     | 9523,034  | 3106,848  | 0,064        | 0,113 | 509666,890   |
| 1078,530 | 51829,11 | 12007,463  | 14,405  | 1079,739     | 8143,272  | 3413,122  | 0,059        | 0,132 | 1071275,215  |
| 1100,548 | 52350,95 | 7969,839   | 9,258   | 826,002      | 10176,066 | 1688,577  | 0,039        | 0,108 | 473422,382   |
| 1105,501 | 52467,62 | 12527,914  | 15,060  | 9673,942     | 9512,755  | 3157,582  | 0,061        | 0,116 | 168424,821   |
| 1108,585 | 52540,14 | 9193,187   | 10,746  | 922,335      | 5403,019  | 4025,552  | 0,045        | 0,205 | 743482,562   |
| 1122,523 | 52866,58 | 147330,594 | 187,663 | 83908,915    | 8566,182  | 43616,031 | 0,718        | 0,131 | 15014771,209 |
| 1138,500 | 53238,29 | 21368,570  | 26,324  | 29112,798    | 8945,204  | 6216,232  | 0,104        | 0,127 | 342254,531   |
| 1144,511 | 53377,46 | 179717,319 | 229,447 | 119147,364   | 7561,536  | 63955,645 | 0,876        | 0,151 | 19284575,954 |
| 1160,491 | 53745,67 | 32942,944  | 41,399  | 30252,573    | 8162,106  | 11022,490 | 0,161        | 0,142 | 1300558,578  |
| 1193,572 | 54499,92 | 5597,985   | 6,303   | 1358,509     | 10367,845 | 1327,398  | 0,027        | 0,115 | 122045,955   |
| 1209,562 | 54860,74 | 5830,978   | 6,672   | 1002,305     | 8106,156  | 1952,483  | 0,028        | 0,149 | 226131,207   |
| 1222,604 | 55153,25 | 6577,621   | 7,695   | 262,852      | 8316,601  | 2122,177  | 0,032        | 0,147 | 1124036,900  |
| 1231,554 | 55353,08 | 6342,114   | 7,415   | 1111,910     | 7298,592  | 2457,971  | 0,031        | 0,169 | 250107,779   |
| 1235,616 | 55443,55 | 11869,177  | 14,724  | 3612,341     | 9609,657  | 3482,417  | 0,058        | 0,129 | 326569,666   |

|          |          |           |        |           |           |          |       |       |            |
|----------|----------|-----------|--------|-----------|-----------|----------|-------|-------|------------|
| 1244,593 | 55642,93 | 8558,530  | 10,387 | 882,987   | 8170,669  | 3057,712 | 0,042 | 0,152 | 591163,953 |
| 1257,599 | 55930,51 | 13484,477 | 16,936 | 4451,135  | 8956,620  | 4550,149 | 0,066 | 0,140 | 566959,339 |
| 1341,852 | 57758,47 | 8036,773  | 10,179 | 2773,941  | 10301,067 | 2514,128 | 0,039 | 0,130 | 156031,703 |
| 1344,642 | 57818,02 | 5130,420  | 6,193  | 645,612   | 7030,599  | 2351,539 | 0,025 | 0,191 | 329457,326 |
| 1363,818 | 58225,51 | 5756,157  | 7,177  | 664,707   | 3619,862  | 4809,256 | 0,028 | 0,377 | 569999,877 |
| 1385,647 | 58685,93 | 25508,710 | 35,657 | 82244,602 | 10566,960 | 8928,400 | 0,124 | 0,131 | 302836,479 |
| 1401,638 | 59020,89 | 5038,231  | 6,366  | 815,594   | 9028,252  | 1927,789 | 0,025 | 0,155 | 243286,146 |
| 1655,818 | 64108,26 | 3756,328  | 6,205  | 482,298   | 10446,820 | 1640,695 | 0,018 | 0,158 | 271538,515 |
| 1854,876 | 67823,80 | 3492,292  | 7,602  | 863,730   | 11474,875 | 1813,453 | 0,017 | 0,162 | 147770,805 |
| 1985,917 | 70161,38 | 12353,784 | 39,547 | 39982,662 | 14517,393 | 5893,837 | 0,060 | 0,137 | 249924,178 |
| 1994,049 | 70303,86 | 3025,735  | 8,624  | 3663,019  | 12077,856 | 1443,714 | 0,015 | 0,165 | 26241,513  |
| 2002,911 | 70458,79 | 3944,856  | 11,987 | 1173,667  | 12521,488 | 2076,006 | 0,019 | 0,160 | 164611,974 |
| 2090,095 | 71965,08 | 2377,494  | 7,752  | 1789,172  | 14364,798 | 960,937  | 0,012 | 0,146 | 29642,993  |
| 2093,129 | 72016,92 | 5345,026  | 20,018 | 19340,146 | 14621,301 | 2500,834 | 0,026 | 0,143 | 41841,817  |
| 2207,168 | 73939,03 | 1949,459  | 7,806  | 2208,915  | 13029,945 | 966,667  | 0,010 | 0,169 | 18115,060  |
| 2704,701 | 81793,28 | 1236,879  | 10,856 | 2001,862  | 9779,409  | 1078,183 | 0,006 | 0,277 | 13293,905  |
| 2732,736 | 82213,31 | 1281,717  | 11,842 | 2029,625  | 8387,747  | 1334,462 | 0,006 | 0,326 | 16224,513  |

**Table S2.** List of MALDI-TOF MS mass peaks for EVs lipid extract of *C. acnes* DSM 16379 strain. Green and yellow lines have been removed from the analysis as matrix and medium contamination respectively.

| m/z      | time     | Intens.    | SN      | Quality Fac. | Res.     | Area      | Rel. Intens. | FWHM  | Chi^2        |
|----------|----------|------------|---------|--------------|----------|-----------|--------------|-------|--------------|
| 707,338  | 42053,80 | 8595,439   | 7,516   | 919,683      | 4441,440 | 2291,304  | 0,061        | 0,159 | 414354,978   |
| 739,424  | 42987,91 | 28358,327  | 26,694  | 12987,415    | 5966,886 | 6438,395  | 0,202        | 0,124 | 1018176,438  |
| 751,356  | 43330,08 | 7370,162   | 6,145   | 136,931      | 5559,242 | 1635,198  | 0,053        | 0,135 | 2008958,273  |
| 755,395  | 43445,30 | 7266,115   | 6,033   | 1232,385     | 7100,977 | 1211,827  | 0,052        | 0,106 | 164706,531   |
| 767,448  | 43787,24 | 8040,943   | 6,751   | 255,711      | 3400,850 | 2859,946  | 0,057        | 0,226 | 1368277,586  |
| 805,455  | 44848,26 | 8377,030   | 7,034   | 2768,136     | 7294,448 | 1521,239  | 0,060        | 0,110 | 93572,530    |
| 812,361  | 45038,32 | 21036,329  | 19,403  | 4735,415     | 6665,582 | 4786,721  | 0,150        | 0,122 | 1093730,245  |
| 827,431  | 45450,28 | 51352,525  | 48,963  | 38425,522    | 6545,634 | 12634,918 | 0,366        | 0,126 | 2017743,200  |
| 834,339  | 45637,85 | 20811,809  | 19,132  | 8280,880     | 6277,632 | 5271,830  | 0,148        | 0,133 | 668657,792   |
| 843,401  | 45882,75 | 18017,022  | 16,402  | 7340,204     | 6304,412 | 4455,778  | 0,128        | 0,134 | 542765,575   |
| 855,463  | 46206,68 | 21401,762  | 19,694  | 7632,420     | 6208,602 | 5553,900  | 0,153        | 0,138 | 867100,967   |
| 860,395  | 46338,47 | 25275,696  | 23,506  | 22578,781    | 7131,186 | 5811,319  | 0,180        | 0,121 | 390119,364   |
| 865,419  | 46472,32 | 23916,879  | 22,196  | 14672,943    | 6948,444 | 5585,757  | 0,171        | 0,125 | 477444,820   |
| 871,438  | 46632,16 | 9504,469   | 8,077   | 1455,180     | 6504,603 | 2256,629  | 0,068        | 0,134 | 270091,112   |
| 882,374  | 46921,21 | 38699,333  | 36,765  | 21676,120    | 6714,925 | 10125,327 | 0,276        | 0,131 | 1802530,738  |
| 901,511  | 47422,68 | 10958,107  | 9,411   | 3232,242     | 7352,917 | 2382,519  | 0,078        | 0,123 | 159468,579   |
| 911,426  | 47680,39 | 136080,805 | 133,387 | 89357,489    | 7450,162 | 33971,650 | 0,970        | 0,122 | 7853789,461  |
| 923,492  | 47992,14 | 18577,521  | 16,903  | 6053,450     | 6951,842 | 4609,151  | 0,132        | 0,133 | 441541,648   |
| 927,404  | 48092,77 | 14888,876  | 13,270  | 6296,817     | 6877,195 | 3822,156  | 0,106        | 0,135 | 281401,703   |
| 929,537  | 48147,54 | 7654,175   | 6,068   | 693,862      | 6474,534 | 1856,594  | 0,055        | 0,144 | 335918,333   |
| 933,405  | 48246,72 | 140238,087 | 137,627 | 95359,211    | 7354,664 | 36901,130 | 1,000        | 0,127 | 10424579,602 |
| 949,375  | 48654,02 | 21313,840  | 19,712  | 3493,346     | 6902,048 | 5983,258  | 0,152        | 0,138 | 1104404,671  |
| 951,536  | 48708,87 | 11902,998  | 10,330  | 591,907      | 4132,780 | 4875,807  | 0,085        | 0,230 | 1409719,889  |
| 982,482  | 49487,58 | 9171,360   | 7,741   | 2035,378     | 7716,328 | 2022,233  | 0,065        | 0,127 | 175255,265   |
| 987,507  | 49612,85 | 10997,001  | 9,661   | 2162,847     | 7413,730 | 2657,927  | 0,078        | 0,133 | 260871,764   |
| 989,487  | 49662,13 | 17611,438  | 16,361  | 11232,941    | 6941,857 | 4997,039  | 0,126        | 0,143 | 383050,316   |
| 1005,459 | 50057,81 | 7434,611   | 6,081   | 582,390      | 6973,446 | 1911,469  | 0,053        | 0,144 | 457798,321   |
| 1023,482 | 50500,55 | 10847,698  | 9,661   | 328,289      | 7043,958 | 2989,273  | 0,077        | 0,145 | 2068270,485  |
| 1033,491 | 50744,75 | 10224,827  | 9,072   | 1010,988     | 7968,762 | 2530,229  | 0,073        | 0,130 | 517663,068   |
| 1045,457 | 51035,12 | 13589,235  | 12,607  | 536,356      | 6611,229 | 4327,770  | 0,097        | 0,158 | 2293019,205  |
| 1105,508 | 52467,78 | 9662,485   | 8,743   | 801,065      | 7638,958 | 2779,040  | 0,069        | 0,145 | 741161,843   |
| 1122,530 | 52866,75 | 48430,864  | 50,763  | 76169,818    | 8252,554 | 14869,834 | 0,345        | 0,136 | 1213052,237  |
| 1144,508 | 53377,41 | 74715,953  | 80,056  | 47337,910    | 7885,700 | 25436,003 | 0,533        | 0,145 | 5960745,112  |
| 1160,480 | 53745,42 | 11012,760  | 10,471  | 1479,603     | 7266,626 | 3810,523  | 0,079        | 0,160 | 481557,018   |
| 1213,698 | 54953,67 | 14810,618  | 15,330  | 2410,674     | 7607,498 | 5210,922  | 0,106        | 0,160 | 676860,806   |
| 1257,601 | 55930,57 | 8298,134   | 8,266   | 1310,422     | 6657,697 | 3372,072  | 0,059        | 0,189 | 329167,473   |
| 1341,855 | 57758,55 | 6793,626   | 7,112   | 1615,698     | 8160,805 | 2307,190  | 0,048        | 0,164 | 158891,148   |
| 1363,837 | 58225,92 | 10362,894  | 12,220  | 2339,077     | 7657,981 | 4331,814  | 0,074        | 0,178 | 321548,490   |
| 1385,649 | 58685,97 | 5992,834   | 6,395   | 1597,534     | 8788,259 | 2014,422  | 0,043        | 0,158 | 124712,257   |
| 1391,873 | 58816,57 | 6754,319   | 7,521   | 612,535      | 5989,723 | 3352,738  | 0,048        | 0,232 | 475628,718   |

|          |          |           |        |           |           |          |       |       |            |
|----------|----------|-----------|--------|-----------|-----------|----------|-------|-------|------------|
| 1437,921 | 59773,87 | 10617,966 | 13,987 | 10090,757 | 10037,082 | 3697,805 | 0,076 | 0,143 | 133079,341 |
| 1465,950 | 60349,07 | 7000,917  | 8,878  | 1784,702  | 8261,204  | 2923,120 | 0,050 | 0,177 | 176414,961 |

**Table S3.** List of MALDI-TOF MS mass peaks for EVs lipid extract of *C. acnes* PCM 2334 strain. Yellow lines have been removed from the analysis as medium contamination.

| m/z      | time     | Intens.    | SN      | Quality Fac. | Res.     | Area       | Rel. Intens. | FWHM  | Chi^2        |
|----------|----------|------------|---------|--------------|----------|------------|--------------|-------|--------------|
| 711,393  | 42173,01 | 25249,087  | 20,923  | 29540,956    | 7745,320 | 4044,495   | 0,073        | 0,092 | 149076,751   |
| 717,453  | 42350,54 | 8939,198   | 7,015   | 3632,921     | 7746,894 | 1388,920   | 0,026        | 0,093 | 103718,974   |
| 733,370  | 42813,26 | 19925,299  | 16,190  | 20241,996    | 6666,730 | 3908,831   | 0,058        | 0,110 | 150896,112   |
| 739,425  | 42987,95 | 39700,838  | 32,918  | 23511,336    | 7490,231 | 7098,064   | 0,115        | 0,099 | 876549,036   |
| 755,400  | 43445,44 | 13491,777  | 10,713  | 3885,651     | 7095,387 | 2517,013   | 0,039        | 0,106 | 200225,057   |
| 812,365  | 45038,43 | 27064,829  | 21,595  | 7490,707     | 7706,214 | 5306,403   | 0,078        | 0,105 | 1120210,424  |
| 827,436  | 45450,41 | 25356,072  | 19,865  | 11629,126    | 7322,188 | 5361,726   | 0,073        | 0,113 | 691243,575   |
| 834,345  | 45638,01 | 19857,146  | 15,336  | 3585,534     | 6761,357 | 4675,293   | 0,057        | 0,123 | 1038037,317  |
| 843,404  | 45882,83 | 16878,082  | 12,862  | 1999,943     | 6244,348 | 4128,087   | 0,049        | 0,135 | 944631,563   |
| 860,397  | 46338,53 | 45410,612  | 35,644  | 52986,345    | 7888,167 | 9428,012   | 0,131        | 0,109 | 741564,875   |
| 865,424  | 46472,46 | 51969,095  | 40,835  | 65880,229    | 7743,514 | 11085,086  | 0,150        | 0,112 | 973286,514   |
| 867,440  | 46526,04 | 17810,212  | 13,481  | 3696,974     | 6918,970 | 4342,056   | 0,051        | 0,125 | 444557,840   |
| 882,380  | 46921,36 | 55358,125  | 43,221  | 25835,283    | 7051,983 | 13723,599  | 0,160        | 0,125 | 3274902,108  |
| 889,463  | 47107,59 | 14248,120  | 10,457  | 9349,387     | 7949,680 | 2883,579   | 0,041        | 0,112 | 101955,831   |
| 898,348  | 47340,17 | 10537,159  | 7,491   | 560,704      | 5571,714 | 3314,777   | 0,030        | 0,161 | 1351479,924  |
| 911,432  | 47680,55 | 346406,000 | 273,331 | 128858,599   | 7603,979 | 83050,036  | 1,000        | 0,120 | 49422099,823 |
| 927,410  | 48092,91 | 48571,566  | 37,209  | 68600,952    | 8123,200 | 11030,142  | 0,140        | 0,114 | 773276,102   |
| 933,415  | 48246,98 | 255667,373 | 200,702 | 93687,261    | 7311,179 | 66612,652  | 0,738        | 0,128 | 39465583,533 |
| 949,394  | 48654,51 | 53010,019  | 40,471  | 29496,587    | 7871,341 | 12937,263  | 0,153        | 0,121 | 2493729,895  |
| 982,484  | 49487,64 | 17692,619  | 12,806  | 4709,504     | 7911,090 | 4158,091   | 0,051        | 0,124 | 350569,625   |
| 987,520  | 49613,18 | 18687,768  | 13,658  | 4465,944     | 8483,287 | 4198,663   | 0,054        | 0,116 | 507733,013   |
| 998,464  | 49884,92 | 10394,521  | 7,137   | 535,731      | 7174,517 | 2805,487   | 0,030        | 0,139 | 1076494,981  |
| 1004,468 | 50033,36 | 10065,378  | 6,886   | 387,631      | 7393,477 | 2553,967   | 0,029        | 0,136 | 1529936,470  |
| 1008,495 | 50132,69 | 17894,414  | 12,955  | 1307,475     | 7656,529 | 4673,725   | 0,052        | 0,132 | 1912261,045  |
| 1010,510 | 50182,31 | 12663,105  | 8,880   | 334,536      | 7817,285 | 3133,250   | 0,037        | 0,129 | 2975472,076  |
| 1023,469 | 50500,25 | 17280,200  | 12,455  | 1124,019     | 9080,865 | 3818,280   | 0,050        | 0,113 | 1512018,931  |
| 1024,505 | 50525,57 | 19606,963  | 14,275  | 1672,144     | 7505,330 | 5205,536   | 0,057        | 0,137 | 1691982,887  |
| 1030,468 | 50671,11 | 12761,220  | 8,903   | 376,499      | 6840,665 | 3930,669   | 0,037        | 0,151 | 2849727,067  |
| 1033,504 | 50745,05 | 21933,808  | 16,041  | 1487,688     | 7770,787 | 5970,036   | 0,063        | 0,133 | 3244777,880  |
| 1045,466 | 51035,34 | 22306,576  | 16,274  | 2894,410     | 6756,692 | 7140,279   | 0,064        | 0,155 | 2159704,085  |
| 1046,507 | 51060,52 | 17968,914  | 12,886  | 478,105      | 8863,199 | 4255,890   | 0,052        | 0,118 | 3686312,869  |
| 1061,493 | 51421,65 | 10677,721  | 7,221   | 302,325      | 5704,612 | 3845,160   | 0,031        | 0,186 | 2314922,856  |
| 1076,529 | 51781,43 | 18155,286  | 12,998  | 2653,021     | 8626,052 | 4573,592   | 0,052        | 0,125 | 931776,099   |
| 1078,538 | 51829,31 | 17793,167  | 12,682  | 1171,725     | 8303,395 | 4730,472   | 0,051        | 0,130 | 1774452,712  |
| 1100,563 | 52351,32 | 12708,069  | 8,752   | 656,674      | 8858,034 | 2982,809   | 0,037        | 0,124 | 1624605,559  |
| 1105,517 | 52467,99 | 23192,673  | 16,824  | 14503,199    | 8490,921 | 6462,773   | 0,067        | 0,130 | 462159,387   |
| 1108,595 | 52540,36 | 12988,520  | 8,894   | 799,005      | 5025,601 | 5939,203   | 0,037        | 0,221 | 1581579,271  |
| 1122,537 | 52866,90 | 212886,146 | 163,586 | 119581,867   | 8235,001 | 64496,715  | 0,615        | 0,136 | 19196390,540 |
| 1138,517 | 53238,69 | 30693,263  | 22,622  | 20577,633    | 8385,404 | 9160,831   | 0,089        | 0,136 | 791372,651   |
| 1144,521 | 53377,71 | 289919,776 | 223,766 | 56785,526    | 7273,728 | 105887,213 | 0,837        | 0,157 | 76850945,618 |
| 1160,502 | 53745,93 | 54416,615  | 41,249  | 28014,219    | 7833,143 | 18689,168  | 0,157        | 0,148 | 3249197,938  |

|          |          |           |        |           |           |           |       |       |             |
|----------|----------|-----------|--------|-----------|-----------|-----------|-------|-------|-------------|
| 1209,562 | 54860,73 | 9395,384  | 6,329  | 486,990   | 7446,066  | 3326,044  | 0,027 | 0,162 | 1232459,356 |
| 1215,568 | 54995,64 | 9008,921  | 6,048  | 628,450   | 7351,377  | 3182,917  | 0,026 | 0,165 | 831981,459  |
| 1222,619 | 55153,59 | 9961,933  | 6,835  | 243,846   | 7886,894  | 3194,175  | 0,029 | 0,155 | 2544194,623 |
| 1231,562 | 55353,26 | 10268,799 | 7,107  | 949,390   | 7066,188  | 3977,305  | 0,030 | 0,174 | 735543,629  |
| 1235,633 | 55443,94 | 17141,165 | 12,636 | 2562,311  | 8889,168  | 5183,465  | 0,049 | 0,139 | 754150,793  |
| 1244,607 | 55643,24 | 15196,288 | 11,165 | 361,303   | 7900,964  | 5457,801  | 0,044 | 0,158 | 4554053,125 |
| 1257,612 | 55930,80 | 21817,000 | 16,630 | 3615,856  | 8659,444  | 7372,888  | 0,063 | 0,145 | 1378769,302 |
| 1341,876 | 57758,99 | 9059,433  | 6,579  | 456,859   | 5931,177  | 4243,006  | 0,026 | 0,226 | 1386544,798 |
| 1363,793 | 58224,99 | 9082,693  | 6,702  | 1149,793  | 3496,449  | 7954,794  | 0,026 | 0,390 | 848232,291  |
| 1385,663 | 58686,26 | 46040,032 | 39,231 | 78578,054 | 9802,566  | 16848,314 | 0,133 | 0,141 | 994824,119  |
| 1401,655 | 59021,24 | 10034,921 | 7,813  | 1407,637  | 8750,518  | 3893,089  | 0,029 | 0,160 | 546950,509  |
| 1655,825 | 64108,38 | 5979,858  | 6,103  | 954,976   | 9072,097  | 2935,693  | 0,017 | 0,183 | 329771,511  |
| 1683,843 | 64644,41 | 5709,634  | 6,056  | 1950,664  | 9839,222  | 2711,857  | 0,016 | 0,171 | 139274,494  |
| 1854,894 | 67824,12 | 5025,469  | 6,888  | 1198,024  | 10679,318 | 2670,366  | 0,015 | 0,174 | 208425,534  |
| 1985,938 | 70161,75 | 15044,484 | 32,700 | 17361,432 | 12430,881 | 8015,668  | 0,043 | 0,160 | 381050,400  |
| 2001,921 | 70441,51 | 4720,807  | 9,369  | 580,936   | 11498,445 | 2523,912  | 0,014 | 0,174 | 436550,081  |
| 2093,133 | 72017,00 | 3254,461  | 7,295  | 2353,304  | 10297,157 | 1878,581  | 0,009 | 0,203 | 46004,830   |



## List of MALDI-TOF MS mass peaks for cellular lipid extract of *C. acnes* strains

**Table S4.** List of MALDI-TOF MS mass peaks for cellular lipid extract of *C. acnes* DSM 1897 strain. Yellow lines have been removed from the analysis as medium contamination.

| m/z      | time     | Intens.    | SN      | Quality Fac. | Res.     | Area      | Rel. Intens. | FWHM  | Chi^2        |
|----------|----------|------------|---------|--------------|----------|-----------|--------------|-------|--------------|
| 717,498  | 42351,87 | 28512,136  | 50,122  | 90435,179    | 6775,879 | 5457,589  | 0,107        | 0,106 | 227585,925   |
| 723,501  | 42526,95 | 4153,259   | 6,240   | 468,348      | 3100,359 | 1478,959  | 0,016        | 0,233 | 278068,909   |
| 739,467  | 42989,16 | 244380,862 | 442,243 | 128773,644   | 5516,324 | 62024,403 | 0,921        | 0,134 | 24417246,417 |
| 745,532  | 43163,41 | 6055,326   | 9,401   | 5168,208     | 5233,251 | 1390,901  | 0,023        | 0,142 | 100734,777   |
| 753,486  | 43390,88 | 6771,023   | 10,695  | 5367,739     | 4913,012 | 1701,424  | 0,026        | 0,153 | 150574,295   |
| 755,445  | 43446,71 | 19366,872  | 33,531  | 55120,488    | 5861,055 | 4547,597  | 0,073        | 0,129 | 210786,670   |
| 767,498  | 43788,66 | 50091,002  | 89,859  | 82059,500    | 5868,889 | 12360,575 | 0,189        | 0,131 | 1262950,743  |
| 783,467  | 44237,58 | 4880,098   | 7,352   | 697,299      | 5215,949 | 1172,607  | 0,018        | 0,150 | 471267,087   |
| 805,509  | 44849,75 | 39853,433  | 71,668  | 84317,235    | 7122,287 | 8534,269  | 0,150        | 0,113 | 602191,515   |
| 811,505  | 45014,80 | 4659,530   | 6,864   | 718,237      | 4598,969 | 1291,481  | 0,018        | 0,176 | 304402,356   |
| 823,380  | 45339,93 | 4385,766   | 6,059   | 722,114      | 2704,925 | 2109,492  | 0,017        | 0,304 | 181554,007   |
| 825,302  | 45392,32 | 10944,765  | 18,247  | 333,827      | 4760,807 | 3521,487  | 0,041        | 0,173 | 20582235,008 |
| 827,482  | 45451,65 | 265381,924 | 491,083 | 134954,999   | 5493,748 | 79979,327 | 1,000        | 0,151 | 34073247,574 |
| 833,543  | 45616,28 | 7229,866   | 11,359  | 9660,258     | 5380,599 | 1914,839  | 0,027        | 0,155 | 106194,403   |
| 839,500  | 45777,49 | 6058,775   | 9,194   | 4018,164     | 4546,447 | 1854,424  | 0,023        | 0,185 | 142304,173   |
| 841,506  | 45831,65 | 6336,874   | 9,721   | 1779,669     | 4173,993 | 2119,421  | 0,024        | 0,202 | 425721,210   |
| 843,462  | 45884,39 | 23275,836  | 41,356  | 29101,777    | 5939,441 | 6385,084  | 0,088        | 0,142 | 677112,913   |
| 855,514  | 46208,03 | 46930,806  | 85,820  | 85067,632    | 5737,624 | 14036,251 | 0,177        | 0,149 | 1530466,371  |
| 867,561  | 46529,26 | 9119,753   | 15,006  | 14053,876    | 5724,235 | 2436,437  | 0,034        | 0,152 | 132157,286   |
| 871,493  | 46633,63 | 5908,694   | 8,996   | 7031,210     | 6046,058 | 1438,897  | 0,022        | 0,144 | 73003,041    |
| 901,570  | 47424,20 | 4861,946   | 7,006   | 4179,641     | 5296,155 | 1328,104  | 0,018        | 0,170 | 56892,022    |
| 921,604  | 47943,49 | 5002,875   | 7,415   | 4637,261     | 877,677  | 7199,113  | 0,019        | 1,050 | 71677,937    |
| 923,545  | 47993,51 | 7875,416   | 12,723  | 12955,591    | 6214,272 | 2081,523  | 0,030        | 0,149 | 113371,518   |
| 952,062  | 48722,20 | 5820,610   | 9,865   | 2428,919     | 627,113  | 13053,889 | 0,022        | 1,518 | 284246,811   |
| 963,684  | 49016,05 | 15716,251  | 28,011  | 28735,733    | 5765,382 | 5232,972  | 0,059        | 0,167 | 340495,775   |
| 981,625  | 49466,19 | 5580,183   | 8,559   | 11855,676    | 6798,902 | 1345,007  | 0,021        | 0,144 | 29898,076    |
| 991,722  | 49717,69 | 5061,559   | 7,599   | 1967,865     | 4742,926 | 1728,599  | 0,019        | 0,209 | 130372,106   |
| 1009,652 | 50161,17 | 5377,176   | 8,462   | 10176,689    | 6516,282 | 1446,000  | 0,020        | 0,155 | 38336,701    |
| 1029,729 | 50653,09 | 18659,786  | 35,438  | 125079,140   | 7997,365 | 4911,805  | 0,070        | 0,129 | 91992,554    |
| 1051,701 | 51185,98 | 127013,459 | 257,122 | 192479,715   | 6933,297 | 43503,553 | 0,479        | 0,152 | 6023529,883  |
| 1057,762 | 51331,97 | 5427,943   | 8,788   | 8764,571     | 7052,917 | 1450,610  | 0,020        | 0,150 | 47658,508    |
| 1065,717 | 51522,98 | 4753,033   | 7,427   | 2328,725     | 5716,893 | 1551,746  | 0,018        | 0,186 | 115954,911   |
| 1067,687 | 51570,16 | 11371,161  | 20,994  | 28419,395    | 6872,687 | 3575,021  | 0,043        | 0,155 | 150094,189   |
| 1079,739 | 51857,91 | 33172,051  | 65,911  | 77898,831    | 6813,592 | 11717,560 | 0,125        | 0,158 | 833454,411   |
| 1095,717 | 52236,92 | 5926,663   | 9,871   | 11020,113    | 7593,226 | 1596,689  | 0,022        | 0,144 | 51022,422    |
| 1105,761 | 52473,74 | 7839,069   | 13,922  | 1808,693     | 6436,058 | 2680,023  | 0,030        | 0,172 | 988805,324   |
| 1125,795 | 52942,92 | 15228,749  | 29,373  | 81470,451    | 8322,557 | 4384,257  | 0,057        | 0,135 | 107153,514   |
| 1139,681 | 53265,66 | 4979,949   | 7,961   | 4271,194     | 5997,853 | 1763,568  | 0,019        | 0,190 | 82197,083    |
| 1147,768 | 53452,73 | 30433,057  | 62,133  | 90936,929    | 8300,889 | 9657,408  | 0,115        | 0,138 | 511773,680   |
| 1153,848 | 53592,92 | 6925,320   | 12,172  | 1907,675     | 3416,339 | 4535,435  | 0,026        | 0,338 | 364214,606   |

|          |          |           |         |            |           |           |       |       |             |
|----------|----------|-----------|---------|------------|-----------|-----------|-------|-------|-------------|
| 1175,800 | 54096,05 | 13106,803 | 25,735  | 31364,345  | 7670,947  | 4466,980  | 0,049 | 0,153 | 233223,297  |
| 1319,936 | 57288,66 | 25378,918 | 57,866  | 38060,813  | 8702,709  | 9544,555  | 0,096 | 0,152 | 978695,947  |
| 1335,890 | 57631,04 | 3886,822  | 6,628   | 3354,837   | 6343,725  | 1550,037  | 0,015 | 0,211 | 47145,080   |
| 1341,923 | 57760,00 | 40708,729 | 95,560  | 152691,333 | 8820,879  | 16043,052 | 0,153 | 0,152 | 766195,540  |
| 1347,965 | 57888,83 | 11771,145 | 25,676  | 14298,828  | 7238,622  | 5246,511  | 0,044 | 0,186 | 479145,925  |
| 1357,915 | 58100,38 | 3864,720  | 6,504   | 2593,418   | 9084,179  | 1047,353  | 0,015 | 0,149 | 49368,875   |
| 1363,907 | 58227,39 | 68041,930 | 163,035 | 164772,910 | 7244,634  | 34782,977 | 0,256 | 0,188 | 2897076,156 |
| 1369,962 | 58355,47 | 16289,137 | 36,462  | 73656,257  | 8303,886  | 6708,408  | 0,061 | 0,165 | 211113,121  |
| 1379,895 | 58564,96 | 7465,616  | 14,974  | 9665,852   | 5898,893  | 3979,919  | 0,028 | 0,234 | 184850,820  |
| 1390,546 | 58788,74 | 14222,089 | 31,693  | 1283,668   | 3359,825  | 12968,542 | 0,054 | 0,414 | 3374068,047 |
| 1391,954 | 58818,25 | 23205,396 | 53,822  | 14591,818  | 4562,928  | 18111,776 | 0,087 | 0,305 | 3344245,070 |
| 1418,584 | 59373,77 | 4679,218  | 8,608   | 2587,687   | 1608,712  | 8195,680  | 0,018 | 0,882 | 150280,911  |
| 1419,983 | 59402,81 | 4220,444  | 7,151   | 698,021    | 15708,415 | 659,792   | 0,016 | 0,090 | 78219,384   |
| 1455,959 | 60144,67 | 8530,847  | 18,776  | 22862,311  | 7524,225  | 4154,742  | 0,032 | 0,194 | 148262,829  |
| 1484,006 | 60716,68 | 3782,651  | 6,785   | 752,029    | 4442,546  | 2439,387  | 0,014 | 0,334 | 133895,626  |
| 1543,977 | 61921,85 | 24763,994 | 63,391  | 47102,201  | 8231,701  | 13587,110 | 0,093 | 0,188 | 1084770,028 |
| 1572,036 | 62477,65 | 7714,073  | 17,785  | 4167,027   | 5343,682  | 5610,780  | 0,029 | 0,294 | 643601,472  |
| 1631,998 | 63648,95 | 20164,212 | 54,578  | 63165,100  | 8579,734  | 11594,127 | 0,076 | 0,190 | 601917,189  |
| 1660,036 | 64189,24 | 7037,897  | 17,111  | 13209,580  | 6335,340  | 5008,161  | 0,027 | 0,262 | 153624,692  |
| 1768,207 | 66231,96 | 8202,953  | 22,160  | 17336,559  | 6981,751  | 6297,611  | 0,031 | 0,253 | 238968,441  |
| 1796,245 | 66751,14 | 4061,210  | 9,419   | 3633,058   | 5999,751  | 3126,866  | 0,015 | 0,299 | 88458,286   |
| 1856,215 | 67848,10 | 12003,892 | 35,627  | 48832,332  | 8559,529  | 8768,632  | 0,045 | 0,217 | 283821,428  |
| 1884,254 | 68354,89 | 5456,872  | 15,033  | 11013,626  | 6434,445  | 4759,082  | 0,021 | 0,293 | 99151,894   |
| 2080,396 | 71799,09 | 10501,021 | 40,558  | 35692,228  | 8389,157  | 8995,541  | 0,040 | 0,248 | 300224,850  |
| 2108,436 | 72277,92 | 6043,683  | 22,499  | 8367,755   | 6951,062  | 5794,005  | 0,023 | 0,303 | 248710,730  |
| 2152,429 | 73022,79 | 2286,003  | 6,419   | 876,029    | 6567,799  | 1696,676  | 0,009 | 0,328 | 57422,160   |
| 2168,405 | 73291,39 | 13939,470 | 60,475  | 46728,445  | 8971,450  | 11989,752 | 0,053 | 0,242 | 493656,291  |
| 2182,430 | 73526,38 | 2553,523  | 7,669   | 773,067    | 6354,886  | 2067,154  | 0,010 | 0,343 | 91470,456   |
| 2196,442 | 73760,41 | 7960,019  | 33,890  | 14532,870  | 7412,900  | 7899,584  | 0,030 | 0,296 | 289354,365  |
| 2224,462 | 74226,13 | 2380,124  | 7,251   | 1409,593   | 5362,946  | 2228,313  | 0,009 | 0,415 | 46339,972   |
| 2392,631 | 76961,53 | 4620,625  | 23,709  | 11217,028  | 7703,400  | 4746,860  | 0,017 | 0,311 | 92596,880   |
| 2420,660 | 77407,94 | 3291,441  | 16,110  | 4430,245   | 7150,388  | 3426,010  | 0,012 | 0,339 | 51783,560   |
| 2682,817 | 81463,89 | 1328,403  | 6,221   | 1618,637   | 8952,617  | 895,758   | 0,005 | 0,300 | 10293,872   |
| 2688,825 | 81554,45 | 1281,553  | 6,190   | 1547,741   | 5673,978  | 1351,277  | 0,005 | 0,474 | 15279,461   |
| 2704,804 | 81794,83 | 2891,572  | 20,794  | 4064,295   | 7501,219  | 3553,304  | 0,011 | 0,361 | 51366,531   |
| 2732,806 | 82214,36 | 2319,023  | 16,266  | 3630,970   | 7026,967  | 2955,266  | 0,009 | 0,389 | 41288,020   |

**Table S5.** List of MALDI-TOF MS mass peaks for cellular lipid extract of *C. acnes* DSM 16379 strain. Yellow lines have been removed from the analysis as medium contamination.

| m/z      | time     | Intens.    | SN      | Quality Fac. | Res.     | Area       | Rel. Intens. | FWHM  | Chi^2        |
|----------|----------|------------|---------|--------------|----------|------------|--------------|-------|--------------|
| 717,480  | 42351,32 | 44956,131  | 66,753  | 68937,611    | 6814,883 | 8630,517   | 0,120        | 0,105 | 577458,094   |
| 732,414  | 42785,61 | 6289,750   | 8,112   | 755,174      | 1769,389 | 3638,656   | 0,017        | 0,414 | 472443,441   |
| 739,462  | 42989,01 | 373870,197 | 575,463 | 115667,532   | 4829,546 | 109373,383 | 1,000        | 0,153 | 72921282,313 |
| 745,518  | 43163,01 | 12047,132  | 16,759  | 3023,692     | 5735,884 | 2652,768   | 0,032        | 0,130 | 550636,786   |
| 753,484  | 43390,82 | 31790,875  | 47,540  | 33639,623    | 5617,917 | 7747,372   | 0,085        | 0,134 | 825461,173   |
| 755,438  | 43446,50 | 34198,475  | 51,263  | 31018,498    | 5607,786 | 8499,195   | 0,091        | 0,135 | 1104075,032  |
| 761,488  | 43618,51 | 65255,890  | 100,285 | 71591,558    | 6240,828 | 14926,510  | 0,175        | 0,122 | 1765373,637  |
| 767,502  | 43788,78 | 120151,099 | 187,228 | 125938,766   | 5349,628 | 32649,157  | 0,321        | 0,143 | 5321875,593  |
| 772,764  | 43937,22 | 8739,909   | 11,855  | 3208,746     | 2078,674 | 4950,990   | 0,023        | 0,372 | 185936,585   |
| 775,504  | 44014,29 | 7925,403   | 10,549  | 5085,995     | 5398,373 | 1804,783   | 0,021        | 0,144 | 59230,656    |
| 777,469  | 44069,52 | 6390,319   | 8,136   | 578,919      | 5201,856 | 1498,889   | 0,017        | 0,149 | 327209,851   |
| 783,467  | 44237,58 | 10001,408  | 13,941  | 2181,849     | 5282,518 | 2520,756   | 0,027        | 0,148 | 574812,303   |
| 789,521  | 44406,56 | 30698,223  | 46,965  | 30000,804    | 6142,722 | 7305,919   | 0,082        | 0,129 | 824550,592   |
| 800,709  | 44717,15 | 5073,126   | 6,165   | 1195,817     | 1847,151 | 2909,073   | 0,014        | 0,433 | 144035,843   |
| 805,494  | 44849,33 | 55399,575  | 86,996  | 65706,168    | 7015,037 | 12083,273  | 0,148        | 0,115 | 1240599,331  |
| 813,459  | 45068,47 | 5600,970   | 7,076   | 1871,093     | 4288,657 | 1698,850   | 0,015        | 0,190 | 77336,293    |
| 819,515  | 45234,36 | 5198,181   | 6,462   | 312,081      | 4721,936 | 1338,548   | 0,014        | 0,174 | 439064,564   |
| 827,472  | 45451,38 | 330211,478 | 535,470 | 113680,686   | 5124,029 | 108228,398 | 0,883        | 0,161 | 60620722,300 |
| 833,530  | 45615,93 | 12722,081  | 18,574  | 11348,174    | 6241,901 | 3069,309   | 0,034        | 0,134 | 200129,952   |
| 839,566  | 45779,27 | 6246,628   | 8,034   | 401,493      | 2791,661 | 2906,154   | 0,017        | 0,301 | 540587,587   |
| 841,493  | 45831,30 | 26540,143  | 41,251  | 17306,490    | 5376,213 | 8143,352   | 0,071        | 0,157 | 1314565,702  |
| 843,454  | 45884,18 | 32906,520  | 51,879  | 25922,900    | 5808,969 | 9385,620   | 0,088        | 0,145 | 1386700,938  |
| 855,509  | 46207,90 | 92562,543  | 150,323 | 94657,900    | 5446,170 | 29616,360  | 0,248        | 0,157 | 5145575,036  |
| 867,567  | 46529,44 | 6046,694   | 7,801   | 472,129      | 4084,320 | 2041,229   | 0,016        | 0,212 | 341191,343   |
| 871,484  | 46633,40 | 9060,617   | 12,818  | 3211,720     | 6100,032 | 2304,401   | 0,024        | 0,143 | 247300,113   |
| 901,558  | 47423,90 | 68892,262  | 113,706 | 132079,322   | 7449,732 | 16749,687  | 0,184        | 0,121 | 1144712,911  |
| 915,573  | 47787,78 | 10310,418  | 15,361  | 7563,111     | 6919,304 | 2445,343   | 0,028        | 0,132 | 139104,949   |
| 923,543  | 47993,44 | 125863,187 | 211,295 | 113712,236   | 6629,707 | 36418,438  | 0,337        | 0,139 | 6859474,821  |
| 929,593  | 48148,97 | 36176,091  | 59,295  | 118098,604   | 7195,342 | 9339,093   | 0,097        | 0,129 | 330248,773   |
| 937,561  | 48353,05 | 17479,253  | 27,552  | 27257,958    | 6364,064 | 5051,081   | 0,047        | 0,147 | 269174,698   |
| 939,518  | 48403,03 | 8325,160   | 11,985  | 1095,098     | 5896,530 | 2400,873   | 0,022        | 0,159 | 563060,076   |
| 951,577  | 48709,90 | 68208,143  | 114,290 | 160627,118   | 6348,498 | 21541,634  | 0,182        | 0,150 | 1696935,024  |
| 964,584  | 49038,73 | 4892,564   | 6,197   | 781,390      | 3399,837 | 2243,765   | 0,013        | 0,284 | 174509,776   |
| 967,552  | 49113,46 | 5150,449   | 6,645   | 960,416      | 6039,937 | 1353,392   | 0,014        | 0,160 | 105894,477   |
| 1029,709 | 50652,61 | 6458,316   | 9,844   | 3606,994     | 6937,323 | 1705,391   | 0,017        | 0,148 | 51995,020    |
| 1051,699 | 51185,92 | 31237,407  | 56,573  | 94837,020    | 6679,986 | 10660,010  | 0,084        | 0,157 | 462664,475   |
| 1079,732 | 51857,75 | 8867,896   | 14,898  | 9706,638     | 6214,081 | 3119,054   | 0,024        | 0,174 | 116360,107   |
| 1105,761 | 52473,74 | 9803,955   | 16,916  | 8281,251     | 6044,790 | 3692,665   | 0,026        | 0,183 | 195355,941   |
| 1125,782 | 52942,62 | 8069,201   | 13,595  | 4675,200     | 7587,180 | 2335,054   | 0,022        | 0,148 | 128682,564   |
| 1147,770 | 53452,77 | 15105,447  | 28,167  | 39772,008    | 7260,481 | 5212,942   | 0,040        | 0,158 | 159814,158   |
| 1153,826 | 53592,40 | 4636,859   | 6,792   | 699,960      | 3996,656 | 2261,553   | 0,012        | 0,289 | 165245,513   |

|          |          |           |        |            |          |           |       |       |             |
|----------|----------|-----------|--------|------------|----------|-----------|-------|-------|-------------|
| 1175,799 | 54096,03 | 8516,517  | 15,055 | 9362,035   | 6643,455 | 3139,141  | 0,023 | 0,177 | 115838,330  |
| 1319,922 | 57288,36 | 6092,970  | 11,760 | 2619,863   | 7010,897 | 2407,060  | 0,016 | 0,188 | 100528,361  |
| 1341,909 | 57759,69 | 10401,292 | 22,248 | 45177,501  | 7844,455 | 4221,089  | 0,028 | 0,171 | 65615,595   |
| 1363,898 | 58227,21 | 17967,769 | 41,016 | 42339,412  | 6645,926 | 9565,312  | 0,048 | 0,205 | 372234,334  |
| 1369,935 | 58354,89 | 5492,829  | 10,579 | 4666,627   | 7285,931 | 2241,971  | 0,015 | 0,188 | 53476,852   |
| 1377,916 | 58523,28 | 4756,955  | 8,833  | 519,359    | 5318,576 | 2583,897  | 0,013 | 0,259 | 316505,855  |
| 1390,534 | 58788,50 | 4148,214  | 7,403  | 446,050    | 2761,183 | 3556,846  | 0,011 | 0,504 | 357985,500  |
| 1391,945 | 58818,06 | 7881,382  | 16,645 | 2085,866   | 4314,374 | 5896,795  | 0,021 | 0,323 | 355742,056  |
| 1455,948 | 60144,45 | 14221,556 | 34,248 | 39632,281  | 7308,904 | 7512,501  | 0,038 | 0,199 | 249076,779  |
| 1469,953 | 60430,76 | 3541,957  | 6,185  | 966,585    | 6951,078 | 1417,854  | 0,009 | 0,211 | 67876,184   |
| 1477,980 | 60594,25 | 3936,700  | 7,167  | 1320,700   | 7217,636 | 1604,437  | 0,011 | 0,205 | 63490,656   |
| 1483,983 | 60716,22 | 7686,361  | 17,292 | 4032,474   | 5744,022 | 4894,588  | 0,021 | 0,258 | 185660,743  |
| 1543,965 | 61921,62 | 35122,297 | 95,859 | 106796,134 | 7168,500 | 22420,964 | 0,094 | 0,215 | 1020063,303 |
| 1557,983 | 62199,90 | 6989,723  | 16,075 | 2049,274   | 6482,500 | 4179,562  | 0,019 | 0,240 | 347123,344  |
| 1566,009 | 62358,68 | 4257,354  | 8,296  | 1988,557   | 5224,968 | 2688,341  | 0,011 | 0,300 | 68258,602   |
| 1572,006 | 62477,05 | 17418,550 | 46,266 | 14127,166  | 5987,366 | 13155,711 | 0,047 | 0,263 | 808756,208  |
| 1631,988 | 63648,76 | 24836,471 | 71,420 | 59422,257  | 7482,484 | 16563,094 | 0,066 | 0,218 | 778504,150  |
| 1640,050 | 63804,59 | 4436,353  | 9,173  | 1750,957   | 5240,110 | 3015,729  | 0,012 | 0,313 | 84515,516   |
| 1646,009 | 63919,52 | 5418,908  | 12,239 | 997,100    | 6549,911 | 3230,866  | 0,014 | 0,251 | 235771,622  |
| 1660,027 | 64189,07 | 12180,790 | 33,481 | 12119,154  | 6251,162 | 9436,992  | 0,033 | 0,266 | 335432,822  |
| 1668,081 | 64343,42 | 3753,263  | 7,194  | 1331,024   | 4884,056 | 2603,081  | 0,010 | 0,342 | 77675,673   |
| 1728,077 | 65481,66 | 4986,155  | 11,943 | 2967,459   | 5486,032 | 3900,105  | 0,013 | 0,315 | 82808,902   |
| 1756,099 | 66006,49 | 4435,589  | 10,358 | 5596,184   | 5421,786 | 3547,518  | 0,012 | 0,324 | 38548,003   |
| 1768,207 | 66231,95 | 3095,643  | 6,460  | 1446,543   | 3879,926 | 2973,328  | 0,008 | 0,456 | 66733,568   |
| 1856,205 | 67847,92 | 3506,354  | 8,889  | 3957,539   | 7001,367 | 2380,287  | 0,009 | 0,265 | 27822,991   |
| 2080,381 | 71798,84 | 3662,186  | 13,530 | 4212,150   | 7384,606 | 3016,324  | 0,010 | 0,282 | 41774,955   |
| 2108,410 | 72277,48 | 2868,921  | 10,191 | 3103,326   | 6532,807 | 2508,003  | 0,008 | 0,323 | 33281,785   |
| 2168,397 | 73291,27 | 4575,567  | 19,952 | 4634,208   | 7524,259 | 4139,364  | 0,012 | 0,288 | 70532,095   |
| 2182,417 | 73526,16 | 1985,049  | 6,489  | 1250,809   | 6110,613 | 1613,944  | 0,005 | 0,357 | 32238,370   |
| 2196,428 | 73760,16 | 3731,660  | 16,209 | 3377,392   | 6738,427 | 3671,155  | 0,010 | 0,326 | 64316,171   |
| 2348,458 | 76252,61 | 2158,972  | 9,202  | 2876,290   | 6429,066 | 1985,565  | 0,006 | 0,365 | 20731,626   |
| 2376,485 | 76703,18 | 1768,352  | 7,169  | 1845,376   | 5187,510 | 1819,107  | 0,005 | 0,458 | 21764,043   |

**Table S6.** List of MALDI-TOF MS mass peaks for cellular lipid extract of *C. acnes* PCM 2334 strain. Green and yellow lines have been removed from the analysis as matrix and medium contamination.

| m/z      | time     | Intens.    | SN      | Quality Fac. | Res.     | Area      | Rel. Intens. | FWHM  | Chi^2        |
|----------|----------|------------|---------|--------------|----------|-----------|--------------|-------|--------------|
| 707,369  | 42054,71 | 16490,297  | 27,874  | 5718,758     | 4683,360 | 4501,008  | 0,054        | 0,151 | 700325,247   |
| 711,433  | 42174,20 | 8796,179   | 14,160  | 3805,666     | 5113,000 | 2042,784  | 0,029        | 0,139 | 93561,264    |
| 717,487  | 42351,54 | 43315,366  | 76,486  | 41680,400    | 6734,846 | 8363,335  | 0,141        | 0,107 | 635608,698   |
| 732,399  | 42785,18 | 4391,509   | 6,038   | 886,659      | 1292,176 | 3239,320  | 0,014        | 0,567 | 181517,794   |
| 735,396  | 42871,77 | 5149,537   | 7,446   | 614,048      | 4895,417 | 1190,936  | 0,017        | 0,150 | 172650,564   |
| 739,459  | 42988,93 | 307217,078 | 563,622 | 76404,332    | 5263,389 | 81983,488 | 1,000        | 0,140 | 61085101,550 |
| 745,519  | 43163,04 | 9654,535   | 15,563  | 3806,004     | 6637,395 | 1775,796  | 0,031        | 0,112 | 97824,901    |
| 751,399  | 43331,32 | 12218,052  | 20,317  | 3379,280     | 5705,612 | 2783,961  | 0,040        | 0,132 | 360449,679   |
| 753,474  | 43390,54 | 11846,563  | 19,648  | 999,546      | 5897,182 | 2619,649  | 0,039        | 0,128 | 1016986,766  |
| 755,435  | 43446,43 | 53392,897  | 96,913  | 38347,019    | 6110,405 | 12374,620 | 0,174        | 0,124 | 1882443,672  |
| 761,488  | 43618,49 | 5230,411   | 7,449   | 1236,954     | 6345,887 | 913,545   | 0,017        | 0,120 | 68298,866    |
| 767,492  | 43788,48 | 74325,909  | 136,811 | 77728,879    | 5980,765 | 18059,878 | 0,242        | 0,128 | 2492556,620  |
| 772,771  | 43937,40 | 6233,569   | 9,390   | 974,279      | 1499,126 | 4617,306  | 0,020        | 0,515 | 351182,341   |
| 783,462  | 44237,45 | 12313,898  | 20,937  | 4757,835     | 5984,131 | 2840,860  | 0,040        | 0,131 | 247057,701   |
| 795,422  | 44570,66 | 9944,045   | 16,675  | 1804,966     | 4195,208 | 3340,899  | 0,032        | 0,190 | 287412,336   |
| 799,436  | 44681,92 | 5348,073   | 7,953   | 213,833      | 5260,045 | 1254,368  | 0,017        | 0,152 | 550296,344   |
| 805,497  | 44849,40 | 45891,597  | 85,788  | 37383,672    | 7464,882 | 9373,095  | 0,149        | 0,108 | 962464,290   |
| 825,303  | 45392,33 | 5323,769   | 7,720   | 7,029        | 3431,663 | 2035,070  | 0,017        | 0,240 | 27982770,589 |
| 827,473  | 45451,42 | 293091,232 | 566,747 | 88689,881    | 5488,939 | 88517,045 | 0,954        | 0,151 | 55174813,596 |
| 833,532  | 45615,99 | 13940,815  | 24,541  | 15750,801    | 6752,244 | 3100,481  | 0,045        | 0,123 | 107590,082   |
| 839,456  | 45776,32 | 7175,856   | 11,375  | 1206,412     | 3929,918 | 2562,436  | 0,023        | 0,214 | 214030,404   |
| 841,490  | 45831,21 | 12246,955  | 21,305  | 1110,182     | 5208,259 | 3591,380  | 0,040        | 0,162 | 1626341,920  |
| 843,450  | 45884,08 | 55878,298  | 106,484 | 38782,892    | 6247,641 | 14950,262 | 0,182        | 0,135 | 2648660,704  |
| 855,507  | 46207,84 | 95108,577  | 184,182 | 92380,352    | 6065,579 | 27073,672 | 0,310        | 0,141 | 4471989,067  |
| 859,464  | 46313,62 | 5096,313   | 7,380   | 1004,239     | 2883,166 | 2286,073  | 0,017        | 0,298 | 128752,642   |
| 867,537  | 46528,62 | 4873,809   | 6,971   | 1147,878     | 3652,324 | 1696,642  | 0,016        | 0,238 | 84310,665    |
| 871,481  | 46633,30 | 17305,373  | 31,473  | 12472,579    | 6315,694 | 4582,768  | 0,056        | 0,138 | 371819,829   |
| 883,499  | 46950,84 | 6603,626   | 10,575  | 910,893      | 3867,364 | 2506,178  | 0,021        | 0,228 | 236613,385   |
| 901,560  | 47423,95 | 62074,883  | 121,948 | 96502,611    | 7692,308 | 14474,694 | 0,202        | 0,117 | 979500,674   |
| 923,540  | 47993,36 | 86773,828  | 172,613 | 121773,067   | 6872,009 | 24079,556 | 0,282        | 0,134 | 2682914,050  |
| 929,594  | 48149,01 | 21136,716  | 40,178  | 51778,685    | 7356,517 | 5162,490  | 0,069        | 0,126 | 132911,609   |
| 937,556  | 48352,93 | 4421,375   | 6,315   | 708,187      | 6449,857 | 974,379   | 0,014        | 0,145 | 90274,943    |
| 939,521  | 48403,10 | 11228,725  | 20,128  | 6332,712     | 6320,777 | 3140,857  | 0,037        | 0,149 | 187419,811   |
| 942,586  | 48481,30 | 8576,365   | 14,763  | 2633,430     | 6123,108 | 2370,592  | 0,028        | 0,154 | 142621,483   |
| 951,572  | 48709,78 | 30872,644  | 60,464  | 35194,799    | 6328,871 | 9603,550  | 0,100        | 0,150 | 922838,157   |
| 963,675  | 49015,83 | 4502,466   | 6,568   | 393,065      | 6647,504 | 1007,342  | 0,015        | 0,145 | 181505,412   |
| 964,573  | 49038,45 | 11687,350  | 21,342  | 9257,630     | 5605,584 | 3926,816  | 0,038        | 0,172 | 170787,406   |
| 967,553  | 49113,48 | 5054,360   | 7,707   | 888,849      | 5513,453 | 1431,236  | 0,016        | 0,175 | 121472,768   |
| 1023,647 | 50504,60 | 5855,907   | 9,975   | 1589,935     | 5720,599 | 1816,556  | 0,019        | 0,179 | 100825,127   |
| 1029,715 | 50652,76 | 8564,112   | 15,920  | 9627,184     | 7904,820 | 2062,686  | 0,028        | 0,130 | 37698,549    |
| 1051,696 | 51185,85 | 45085,447  | 97,200  | 97199,585    | 7347,142 | 14172,840 | 0,147        | 0,143 | 952479,642   |

|          |          |           |         |            |           |           |       |       |            |
|----------|----------|-----------|---------|------------|-----------|-----------|-------|-------|------------|
| 1067,674 | 51569,87 | 8901,344  | 17,201  | 5450,478   | 6842,704  | 2698,024  | 0,029 | 0,156 | 85161,412  |
| 1079,729 | 51857,68 | 5328,793  | 9,363   | 1633,557   | 6697,789  | 1540,628  | 0,017 | 0,161 | 77983,348  |
| 1105,763 | 52473,78 | 4790,758  | 8,146   | 833,517    | 4682,300  | 1928,089  | 0,016 | 0,236 | 132301,510 |
| 1125,783 | 52942,64 | 13117,420 | 27,623  | 26514,163  | 8663,606  | 3516,861  | 0,043 | 0,130 | 68819,562  |
| 1147,765 | 53452,65 | 20630,235 | 45,879  | 42274,832  | 7616,449  | 6958,406  | 0,067 | 0,151 | 299670,224 |
| 1175,799 | 54096,02 | 3908,867  | 6,222   | 668,373    | 4559,868  | 1527,752  | 0,013 | 0,258 | 93479,605  |
| 1319,926 | 57288,45 | 4471,025  | 8,918   | 2089,588   | 8386,560  | 1259,386  | 0,015 | 0,157 | 42788,515  |
| 1341,904 | 57759,58 | 9398,951  | 22,836  | 15372,154  | 9272,044  | 3206,801  | 0,031 | 0,145 | 84334,092  |
| 1363,895 | 58227,14 | 12107,030 | 30,701  | 16620,856  | 7678,600  | 5321,607  | 0,039 | 0,178 | 193245,332 |
| 1379,869 | 58564,40 | 3858,690  | 7,533   | 1530,160   | 6568,645  | 1548,420  | 0,013 | 0,210 | 46853,523  |
| 1455,940 | 60144,28 | 15191,259 | 42,143  | 45440,745  | 9291,147  | 6386,628  | 0,049 | 0,157 | 188330,513 |
| 1483,970 | 60715,96 | 7448,470  | 19,208  | 6010,799   | 8289,182  | 3311,044  | 0,024 | 0,179 | 94600,015  |
| 1543,957 | 61921,45 | 39077,177 | 122,005 | 125771,419 | 9598,620  | 18619,239 | 0,127 | 0,161 | 998682,755 |
| 1557,973 | 62199,70 | 4312,767  | 9,735   | 1191,602   | 8126,883  | 1787,504  | 0,014 | 0,192 | 87460,505  |
| 1559,943 | 62238,71 | 4517,674  | 10,414  | 1210,695   | 7706,418  | 2003,049  | 0,015 | 0,202 | 99936,954  |
| 1571,990 | 62476,74 | 20004,463 | 61,288  | 32330,143  | 8812,405  | 10460,893 | 0,065 | 0,178 | 591319,658 |
| 1587,969 | 62791,03 | 3395,682  | 6,899   | 1333,139   | 7200,231  | 1443,800  | 0,011 | 0,221 | 40884,096  |
| 1600,038 | 63027,38 | 3676,955  | 7,923   | 791,313    | 5419,759  | 2169,606  | 0,012 | 0,295 | 124843,889 |
| 1631,977 | 63648,54 | 27308,229 | 89,310  | 124075,402 | 10028,319 | 13657,442 | 0,089 | 0,163 | 460932,544 |
| 1640,060 | 63804,77 | 3745,675  | 8,172   | 608,068    | 5132,954  | 2293,390  | 0,012 | 0,320 | 138872,955 |
| 1646,003 | 63919,41 | 3475,582  | 7,256   | 1180,051   | 6929,230  | 1613,764  | 0,011 | 0,238 | 52257,456  |
| 1647,967 | 63957,23 | 4053,797  | 9,275   | 1634,263   | 7767,205  | 1847,096  | 0,013 | 0,212 | 56249,249  |
| 1660,013 | 64188,79 | 17189,693 | 55,757  | 27763,222  | 9126,578  | 9493,643  | 0,056 | 0,182 | 478294,946 |
| 1688,047 | 64724,45 | 3781,097  | 8,563   | 1597,921   | 8169,875  | 1637,014  | 0,012 | 0,207 | 47621,204  |
| 1728,067 | 65481,46 | 4260,282  | 10,746  | 2027,682   | 5683,998  | 2985,295  | 0,014 | 0,304 | 76307,576  |
| 1756,096 | 66006,42 | 3401,929  | 7,697   | 3089,584   | 6355,449  | 1983,495  | 0,011 | 0,276 | 25533,316  |
| 1768,182 | 66231,50 | 5168,141  | 14,635  | 2301,366   | 8016,511  | 2960,535  | 0,017 | 0,221 | 94851,615  |
| 1856,196 | 67847,76 | 6605,751  | 21,950  | 9200,004   | 9701,929  | 3832,656  | 0,022 | 0,191 | 77067,653  |
| 1884,229 | 68354,43 | 3258,354  | 8,917   | 2855,826   | 8727,658  | 1719,222  | 0,011 | 0,216 | 26162,373  |
| 2080,375 | 71798,72 | 3290,910  | 12,782  | 3363,552   | 8556,659  | 2240,597  | 0,011 | 0,243 | 34194,721  |
| 2168,384 | 73291,05 | 4272,656  | 20,077  | 2947,220   | 9439,219  | 3050,270  | 0,014 | 0,230 | 77917,658  |
| 2196,429 | 73760,17 | 2477,129  | 10,099  | 1630,359   | 7567,274  | 1837,998  | 0,008 | 0,290 | 39476,627  |
| 2260,438 | 74819,79 | 2020,151  | 8,006   | 1130,380   | 7356,823  | 1459,265  | 0,007 | 0,307 | 33628,738  |
| 2348,457 | 76252,60 | 2180,340  | 10,373  | 2101,270   | 6595,380  | 1980,233  | 0,007 | 0,356 | 28731,379  |
| 2376,494 | 76703,31 | 1975,022  | 9,201   | 1692,652   | 6483,677  | 1738,356  | 0,006 | 0,367 | 26871,336  |
| 2436,466 | 77658,56 | 1513,468  | 6,522   | 2037,206   | 7476,048  | 1051,919  | 0,005 | 0,326 | 9654,383   |
| 2464,492 | 78100,90 | 1471,556  | 6,388   | 1688,785   | 7944,529  | 957,463   | 0,005 | 0,310 | 10069,335  |

## List of MALDI-TOF MS mass peaks of culture medium

**Table S7.** List of MALDI-TOF mass peaks of culture medium used for *C. acnes* cultivation - thioglycollate-soy broth (TS).

| m/z      | time     | Intens.    | SN      | Quality Fac. | Res.     | Area      | Rel. Intens. | FWHM  | Chi^2       |
|----------|----------|------------|---------|--------------|----------|-----------|--------------|-------|-------------|
| 711,400  | 42173,21 | 5895,899   | 10,160  | 1434,793     | 7227,609 | 962,175   | 0,041        | 0,098 | 112881,501  |
| 733,382  | 42813,59 | 4979,054   | 8,424   | 1678,425     | 7305,451 | 822,477   | 0,035        | 0,100 | 68174,208   |
| 760,846  | 43600,28 | 3896,066   | 6,450   | 1875,371     | 7932,104 | 639,650   | 0,027        | 0,096 | 32079,231   |
| 838,424  | 45748,41 | 4025,972   | 6,357   | 2749,994     | 7376,511 | 781,373   | 0,028        | 0,114 | 25793,460   |
| 843,394  | 45882,57 | 6395,173   | 10,367  | 2330,654     | 6894,298 | 1408,550  | 0,045        | 0,122 | 103016,830  |
| 860,409  | 46338,84 | 19582,853  | 32,642  | 38133,217    | 7878,912 | 3986,069  | 0,137        | 0,109 | 102508,143  |
| 865,437  | 46472,80 | 20773,579  | 34,599  | 37916,610    | 7433,242 | 4438,285  | 0,145        | 0,116 | 140165,980  |
| 867,454  | 46526,42 | 7836,228   | 12,694  | 4110,087     | 8248,040 | 1509,728  | 0,055        | 0,105 | 70996,065   |
| 876,384  | 46763,12 | 5333,059   | 8,401   | 2103,617     | 7483,293 | 1154,055  | 0,037        | 0,117 | 67925,989   |
| 881,410  | 46895,79 | 6739,184   | 10,690  | 250,867      | 7737,191 | 1393,555  | 0,047        | 0,114 | 988672,195  |
| 882,399  | 46921,86 | 28104,473  | 46,622  | 19191,921    | 7367,165 | 6428,297  | 0,196        | 0,120 | 1063451,518 |
| 889,468  | 47107,72 | 9346,775   | 15,023  | 13868,059    | 7235,269 | 2105,318  | 0,065        | 0,123 | 33843,456   |
| 898,372  | 47340,79 | 12009,400  | 19,463  | 6153,021     | 7080,546 | 2961,417  | 0,084        | 0,127 | 126783,295  |
| 911,446  | 47680,92 | 143361,087 | 238,375 | 116364,179   | 7368,268 | 34782,882 | 1,000        | 0,124 | 9144060,241 |
| 927,423  | 48093,25 | 42507,686  | 70,005  | 112401,349   | 7845,870 | 9832,188  | 0,297        | 0,118 | 460837,320  |
| 933,433  | 48247,44 | 125315,449 | 207,560 | 107244,026   | 7109,962 | 32824,820 | 0,874        | 0,131 | 7721369,223 |
| 949,412  | 48654,96 | 60134,661  | 98,808  | 98453,419    | 7620,871 | 14888,343 | 0,419        | 0,125 | 1489249,330 |
| 965,385  | 49058,91 | 5999,444   | 9,079   | 1146,436     | 5395,933 | 2208,142  | 0,042        | 0,179 | 199706,557  |
| 982,508  | 49488,22 | 6658,393   | 10,181  | 2184,141     | 7706,603 | 1545,226  | 0,046        | 0,127 | 111347,186  |
| 987,538  | 49613,62 | 8452,453   | 13,159  | 5127,279     | 8091,468 | 1924,601  | 0,059        | 0,122 | 86013,391   |
| 1004,498 | 50034,10 | 4286,370   | 6,262   | 226,103      | 7084,415 | 1091,524  | 0,030        | 0,142 | 443770,060  |
| 1009,525 | 50158,06 | 5164,482   | 7,713   | 157,170      | 7210,130 | 1337,923  | 0,036        | 0,140 | 971181,683  |
| 1024,531 | 50526,22 | 6851,250   | 10,413  | 958,024      | 7298,323 | 1807,610  | 0,048        | 0,140 | 292329,245  |
| 1027,510 | 50598,98 | 4570,006   | 6,661   | 263,869      | 7318,294 | 1143,925  | 0,032        | 0,140 | 457579,989  |
| 1033,525 | 50745,58 | 6607,376   | 9,955   | 490,186      | 7433,880 | 1715,407  | 0,046        | 0,139 | 555562,942  |
| 1046,523 | 51060,90 | 7275,432   | 11,017  | 2459,246     | 7628,100 | 1900,856  | 0,051        | 0,137 | 127684,854  |
| 1062,498 | 51445,78 | 4299,074   | 6,153   | 575,830      | 6658,374 | 1376,499  | 0,030        | 0,160 | 185744,704  |
| 1073,516 | 51709,54 | 11502,873  | 17,975  | 6049,356     | 7804,268 | 3224,811  | 0,080        | 0,138 | 192785,040  |
| 1089,520 | 52090,26 | 5578,500   | 8,272   | 493,451      | 7009,129 | 1669,145  | 0,039        | 0,155 | 402358,192  |
| 1095,514 | 52232,12 | 7093,830   | 10,743  | 1672,970     | 7094,595 | 2224,536  | 0,049        | 0,154 | 195841,767  |
| 1105,539 | 52468,53 | 12913,466  | 20,269  | 4063,476     | 7969,398 | 3709,495  | 0,090        | 0,139 | 455491,843  |
| 1111,519 | 52609,03 | 4304,999   | 6,180   | 649,063      | 5789,987 | 1636,823  | 0,030        | 0,192 | 187413,407  |
| 1122,560 | 52867,45 | 32694,837  | 52,913  | 63025,491    | 8000,120 | 9843,736  | 0,228        | 0,140 | 418706,880  |
| 1127,531 | 52983,38 | 8986,971   | 13,909  | 2745,777     | 7735,504 | 2715,076  | 0,063        | 0,146 | 200682,076  |
| 1138,545 | 53239,34 | 9600,982   | 14,928  | 2686,591     | 7706,539 | 2968,660  | 0,067        | 0,148 | 215032,429  |
| 1144,550 | 53378,37 | 58270,714  | 95,364  | 23535,541    | 7316,625 | 20487,220 | 0,406        | 0,156 | 2320535,087 |
| 1160,532 | 53746,62 | 23116,078  | 37,478  | 6689,882     | 7301,416 | 8258,094  | 0,161        | 0,159 | 590820,495  |
| 1257,647 | 55931,58 | 5617,918   | 8,886   | 1067,214     | 8097,053 | 1868,204  | 0,039        | 0,155 | 209444,147  |
| 1284,639 | 56523,71 | 4365,436   | 6,829   | 871,436      | 8233,252 | 1432,698  | 0,030        | 0,156 | 147159,067  |
| 1306,630 | 57001,51 | 5001,255   | 8,128   | 1409,227     | 7234,138 | 2079,242  | 0,035        | 0,181 | 135041,712  |

|          |          |          |        |          |          |          |       |       |            |
|----------|----------|----------|--------|----------|----------|----------|-------|-------|------------|
| 1385,711 | 58687,26 | 6508,172 | 11,598 | 4993,162 | 8538,049 | 2485,164 | 0,045 | 0,162 | 65612,358  |
| 1401,698 | 59022,13 | 3654,622 | 6,254  | 852,856  | 8149,401 | 1470,502 | 0,025 | 0,172 | 121474,677 |
| 1986,028 | 70163,34 | 1917,093 | 8,807  | 3607,096 | 9104,308 | 1215,252 | 0,013 | 0,218 | 13012,040  |



## List of MALDI-TOF MS mass peaks of norharmane matrix

**Table S8.** List of MALDI-TOF mass peaks of norharmane matrix.

| m/z     | time     | Intens.   | SN      | Quality Fac. | Res.     | Area     | Rel. Intens. | FWHM  | Chi^2       |
|---------|----------|-----------|---------|--------------|----------|----------|--------------|-------|-------------|
| 704,323 | 41964,96 | 3091,291  | 10,287  | 442,354      | 3245,918 | 1247,570 | 0,099        | 0,217 | 152038,434  |
| 707,394 | 42055,46 | 2229,978  | 7,425   | 353,553      | 1727,743 | 1722,007 | 0,072        | 0,409 | 174145,978  |
| 712,164 | 42195,65 | 3248,755  | 10,841  | 669,599      | 3404,233 | 1311,067 | 0,105        | 0,209 | 119394,238  |
| 715,055 | 42280,38 | 1939,669  | 6,480   | 504,103      | 2808,828 | 985,905  | 0,062        | 0,255 | 70748,476   |
| 737,267 | 42925,76 | 6234,696  | 20,972  | 2895,733     | 4372,003 | 2040,564 | 0,201        | 0,169 | 83924,308   |
| 779,228 | 44118,88 | 3239,626  | 11,096  | 1174,869     | 3431,275 | 1485,503 | 0,104        | 0,227 | 74549,634   |
| 802,347 | 44762,45 | 2618,820  | 9,072   | 609,207      | 5990,646 | 694,667  | 0,084        | 0,134 | 66178,799   |
| 803,355 | 44790,29 | 11642,515 | 40,322  | 30613,840    | 5581,332 | 3223,162 | 0,375        | 0,144 | 63947,377   |
| 810,220 | 44979,48 | 2376,488  | 8,257   | 725,711      | 5165,179 | 739,564  | 0,076        | 0,157 | 50046,214   |
| 823,235 | 45335,97 | 3108,973  | 10,869  | 106,245      | 2822,835 | 1895,019 | 0,100        | 0,292 | 1264209,697 |
| 825,330 | 45393,07 | 31081,363 | 108,681 | 110142,313   | 5400,757 | 9483,886 | 1,000        | 0,153 | 337147,920  |

## MALDI-TOF MS lipid profiles of culture medium and matrix

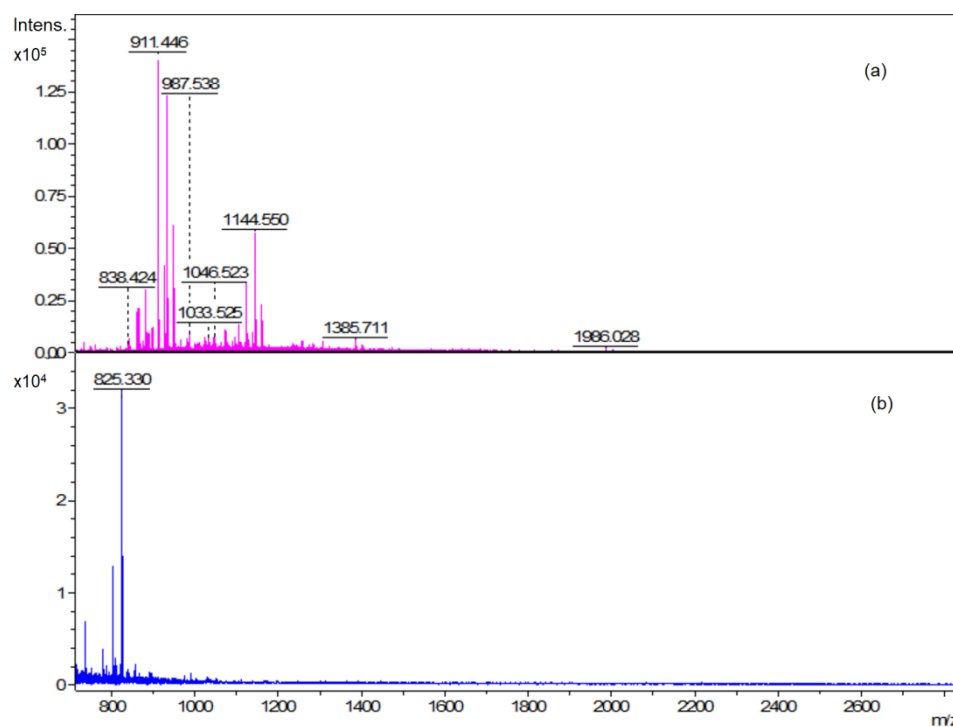

**Figure S3.** Positive ion MALDI-TOF MS spectra of lipid extract of culture medium used for *C. acnes* cultivation - thioglycollate-soy broth (a), and norharmane matrix (b).
